# Supplementary material
Source: PubMed Central journal article supplement (PMC4458139)
Supplement: NIHMS62847-supplement-1.pdf [file NIHMS62847-supplement-1.pdf]

**SUPPLEMENTARY FIGURE 1**

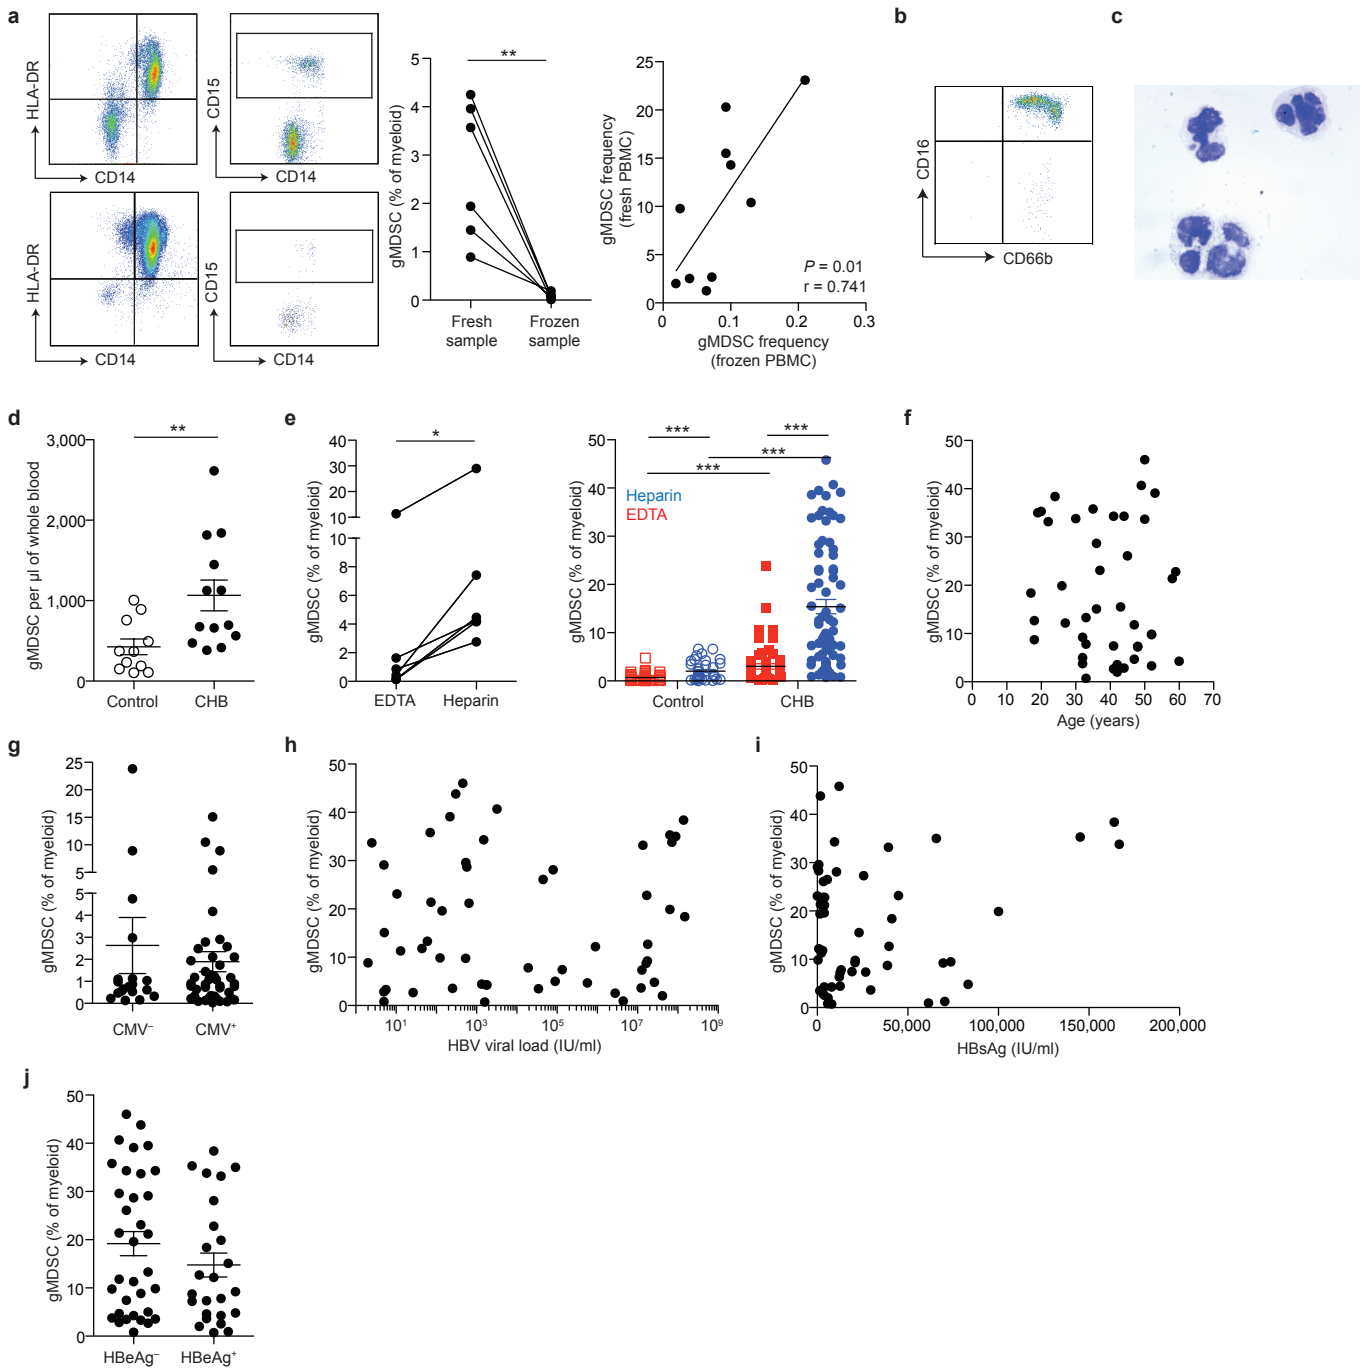

Supplementary Figure 1: Analysis of gMDSC frequencies in CHB cohorts  
**a)** PBMC from a small cohort of patients with CHB and healthy controls were stained for CD33, CD11b, HLA-DR, CD14 and CD15 and analyzed for gMDSC frequencies (as shown in **Fig. 1a**) when freshly isolated (upper-panel) or post-freezing (lower-panel) in FBS supplemented with 10% DMSO (24hr,  $-80^{\circ}\text{C}$ ; comparison sample plots, paired frequencies, and correlation between frequencies). **b)** Representative FACS plot depicting co-expression of CD16 and CD66b on gMDSC. **c)** Haematoxylin-eosin staining of flow cytometric-isolated gMDSC. **d)** Absolute number of gMDSC, assessed using BD-TruCount tubes from whole, heparinised blood ( $n = 11$ , healthy controls;  $n = 13$ , CHB). **e)** gMDSC frequencies from isolated PBMC samples collected in the two different anti-coagulants, EDTA or heparin ( $n = 1$ , healthy control;  $n = 4$ , CHB) and cumulative data from the study cohorts, one collected in EDTA ( $n = 55$ , healthy controls;  $n = 54$ , CHB) and the other in heparin ( $n = 44$ , healthy controls;  $n = 84$ , CHB). Cross-sectional analysis of study participants, gMDSC frequencies were classified (where relevant) by: **f)** age (years), **g)** CMV serostatus, **h)** HBV viral load (IU/ml), **i)** circulating HBsAg (IU/ml) and **j)** presence of HBeAg. Error bars represent the mean  $\pm$  SEM for the cohorts indicated; \*  $p < 0.05$ ; \*\*  $p < 0.01$ ; \*\*\*  $p < 0.001$ ; **a, e** paired  $t$  test; **d, g, j** unpaired  $t$  test; **a, f, h-i** Pearson product-moment correlation coefficient; **e** one way ANOVA (Tukey's multiple comparisons test).

## SUPPLEMENTARY FIGURE 2

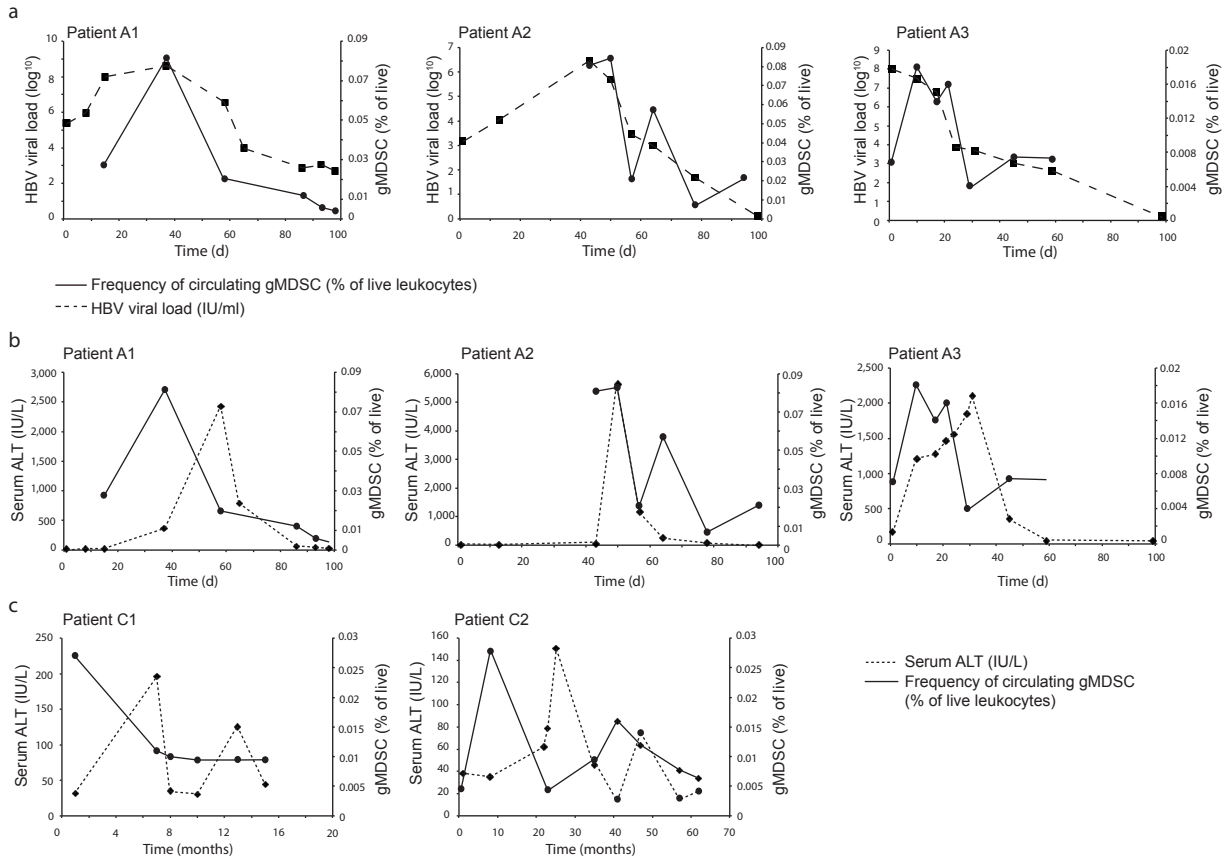

Supplementary Figure 2: *Temporal changes in gMDSC in flares of acute and chronic HBV infection as a percentage of live leukocytes*

gMDSC were quantified as a percentage of live leukocytes from cryopreserved, longitudinal samples as detailed in **Fig. 2**. Frequencies were plotted according to **a**) HBV viral load (IU/ml) in acute HBV infection and throughout hepatic flares as measured by to serum ALT (IU/L) increases >2000 in **b**) acute HBV infection and **c**) throughout spontaneous chronic HBeAg<sup>-</sup> disease.

### SUPPLEMENTARY FIGURE 3

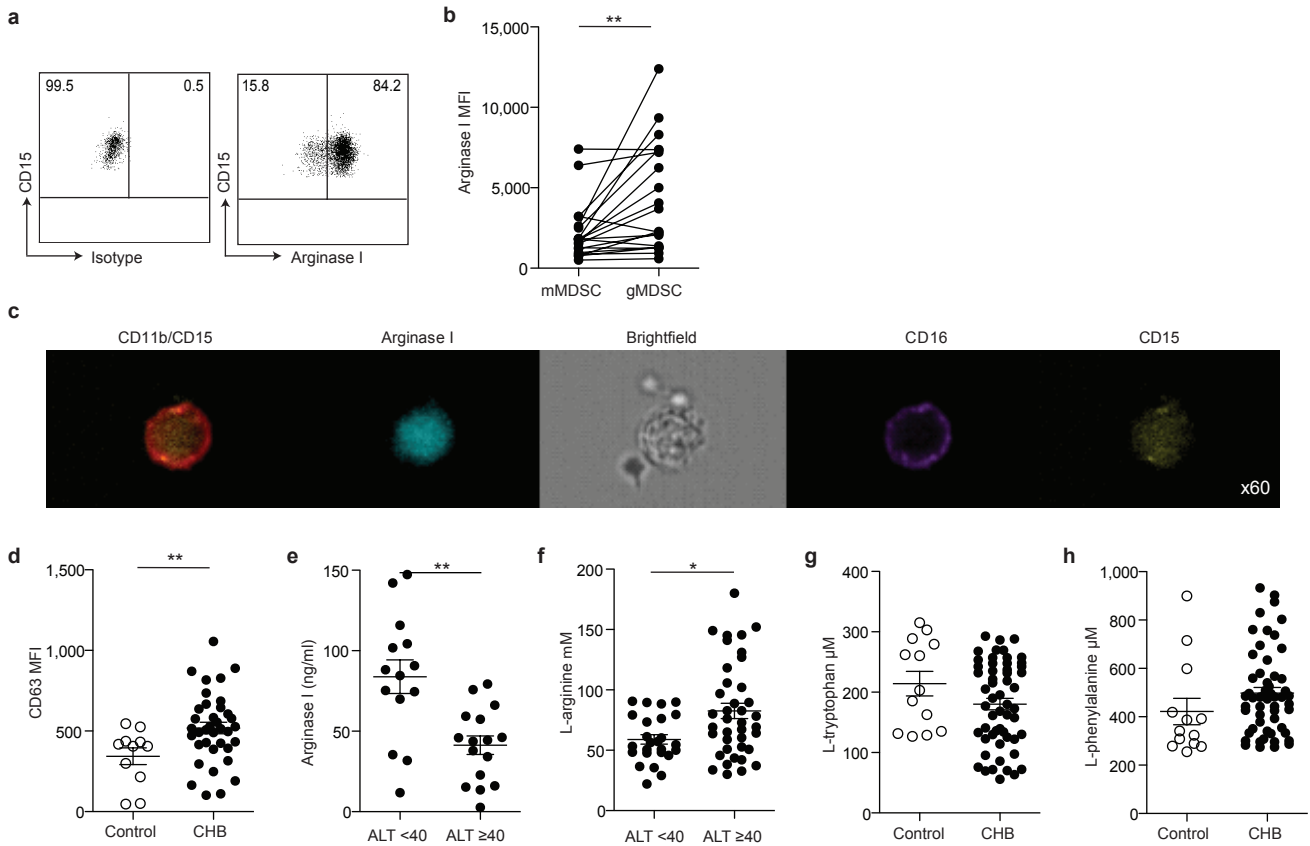

Supplementary Figure 3: *Arginase I* granules in MDSC and serum amino acids

**a**) Representative FACS plots depicting intracellular arginase I staining of gMDSC compared to matched isotype control (gated on live, singlet, CD11b<sup>high</sup>CD33<sup>+</sup>HLA-DR-CD14-CD15<sup>+</sup>). **b**) gMDSC expression (mean fluorescence intensity (MFI)) of arginase I from peripheral mMDSC and gMDSC (n = 21, CHB). **c**) Representative ImageStream ISX (60x objective), cells were stained for CD11b<sup>high</sup>CD15<sup>+</sup>CD16<sup>+</sup> and intracellular arginase I. **d**) Cumulative cell surface CD63 expression (MFI) on gMDSC (n = 10, healthy controls; n = 36, CHB). **e**) Cumulative data: arginase I concentrations (ng/ml) by ELISA classified by serum ALT (IU/L) in subjects with CHB. Tandem high-performance liquid chromatography mass spectrometry analysis of serum **f**) L-arginine concentrations in CHB, cross-sectional analysis according to serum ALT (IU/L) and **g**) L-tryptophan (n = 13, healthy controls; n = 56, CHB) and **h**) L-phenylalanine (n = 13, healthy controls; n = 56, CHB) concentrations (μM). Error bars represent the mean ± SEM for the cohorts indicated; \*\* p<0.01; **b** paired *t* test; **d–h** unpaired *t* test.

**SUPPLEMENTARY FIGURE 4**

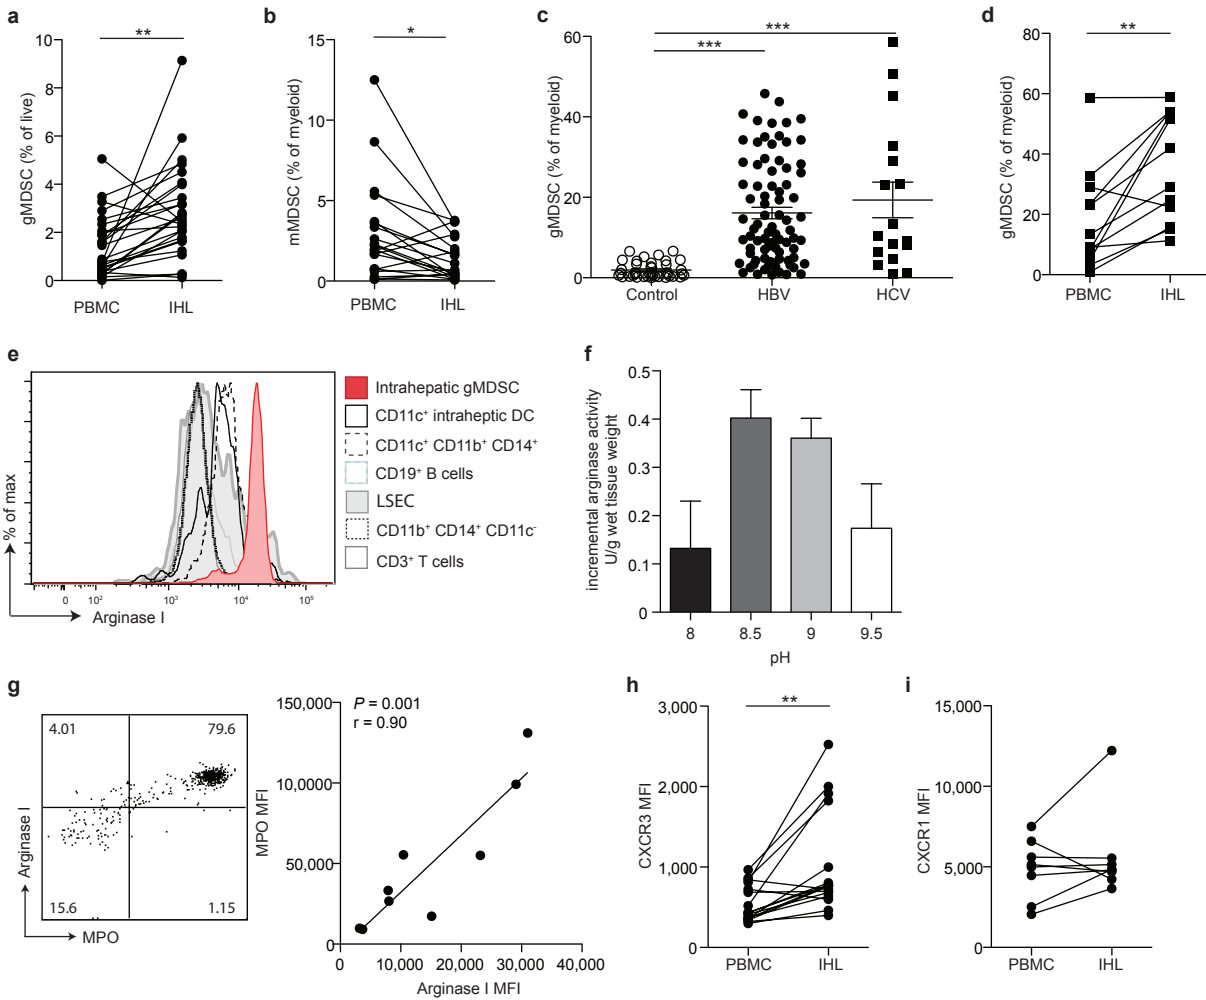

Supplementary Figure 4: *The accumulation of arginase<sup>+</sup> gMDSC in the liver*

**a** Cumulative data: peripheral (PBMC) compared to intrahepatic (IHL) frequencies of gMDSC presented as a percentage of live leukocytes (n = 36, paired CHB). **b** Cumulative data: peripheral and intrahepatic mMDSC frequencies represented as a percentage of myeloid cells (CD11b<sup>high</sup>CD33<sup>+</sup>). **c** Cumulative data: peripheral gMDSC frequencies in an extended cohort of study participants (n = 44, healthy controls; n = 84, CHB; n = 17, chronic HCV infected subjects). **d** Cumulative data comparing peripheral and intrahepatic frequencies of gMDSC in chronic HCV infection (n = 12). **e** Analysis of intracellular arginase I expression (mean fluorescence intensity (MFI)) in various intrahepatic cellular fractions. Subpopulations identified as: CD3<sup>-</sup>CD19<sup>+</sup> B cells, CD3<sup>+</sup> T cells, CD11c<sup>+</sup> intrahepatic dendritic cells, CD11b<sup>+</sup>CD14<sup>+</sup> monocytes, CD11b<sup>+</sup>CD14<sup>+</sup>CD11c<sup>-</sup> monocytes, CD3<sup>-</sup>CD11c<sup>-</sup>CD49d<sup>+</sup> liver sinusoidal endothelial cells (LSEC). **f** Arginase I specific enzymatic activity at increasing pH in healthy liver tissue. **g** Representative example of gMDSC arginase I co-staining with MPO and correlative analysis of gMDSC MPO and arginase I expression. Cumulative expression (MFI) on paired peripheral and intrahepatic gMDSC of **h** CXCR3 (n = 16, CHB) and **i** CXCR1 (n = 8, CHB). Error bars represent the mean ± SEM for the cohorts indicated; \* p<0.05; \*\* p<0.01; \*\*\* p<0.001; **a–b**, **d**, **h–i** paired t test; **c** unpaired t test; **g** Pearson product-moment correlation coefficient.

**SUPPLEMENTARY FIGURE 5**

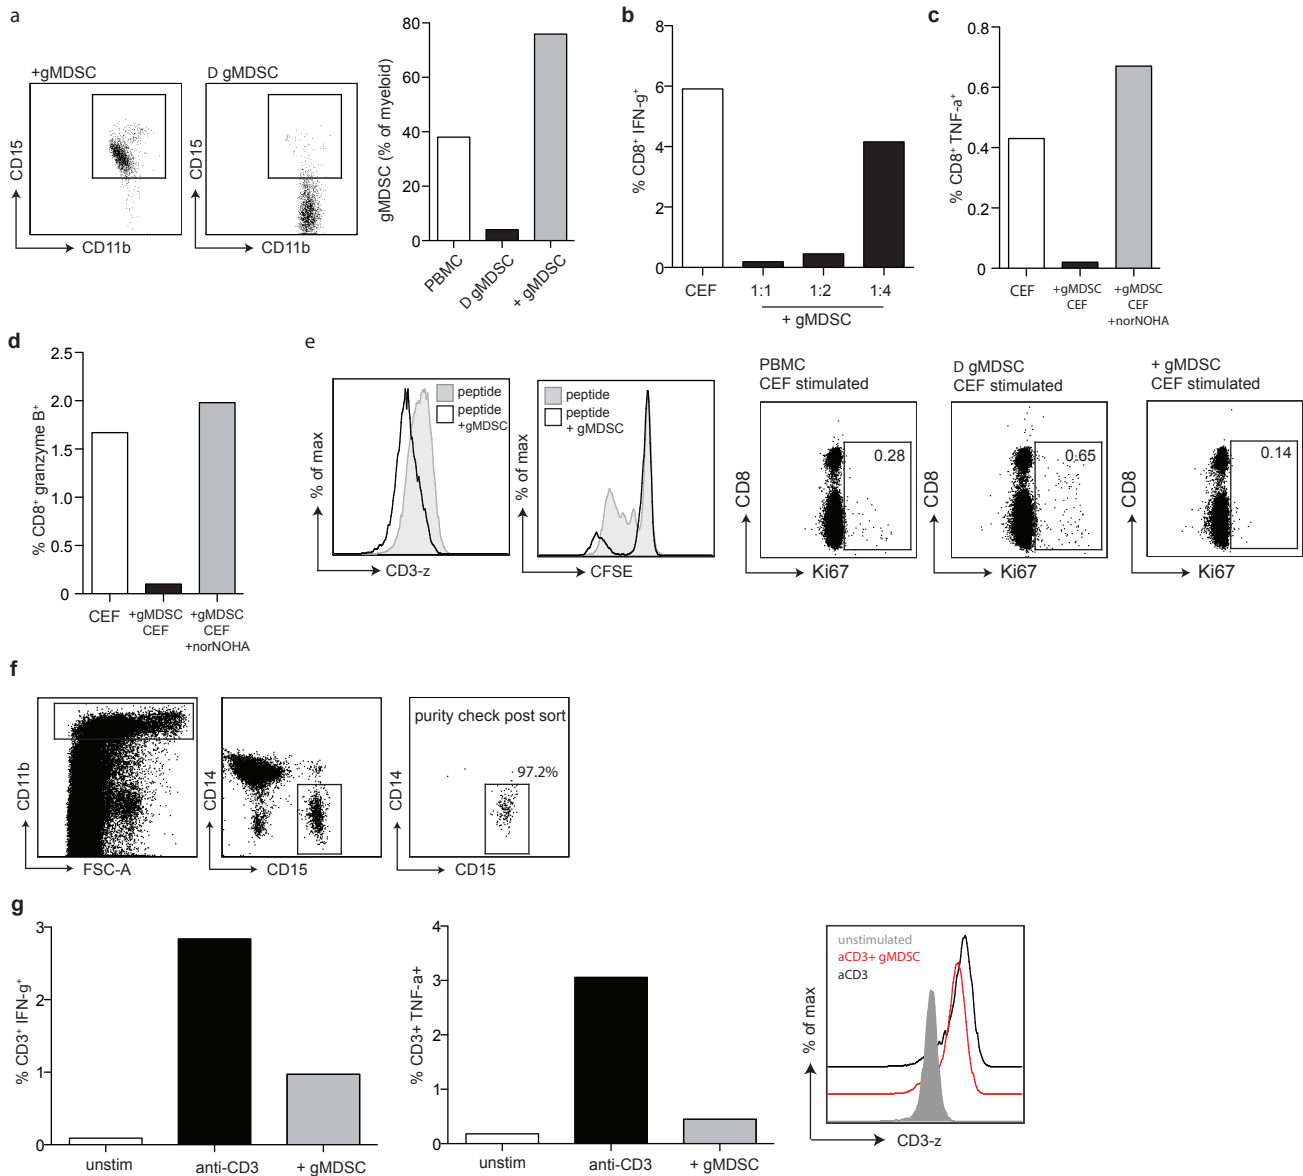

Supplementary Figure 5: Purified gMDSC inhibit expansion of functional T cells

**a**) Sample purity of gMDSC and PBMC depleted of gMDSC ( $\Delta$  gMDSC) using sequential magnetic bead isolation (CD14-CD15<sup>+</sup>). **b**) CD8<sup>+</sup> T cell IFN- $\gamma$  response to 0.5  $\mu$ g/ml CEF peptide stimulation after co-culture with reducing gMDSC:PBMC ratios. Representative examples depicting **c**) CD8<sup>+</sup> TNF- $\alpha$  and **d**) CD8<sup>+</sup> cytotoxicity (granzyme-B accumulation) in the presence or absence of gMDSC and arginase I inhibitor, nor-NOHA. **e**) CD3-z and CFSE dilution of CD3<sup>+</sup> T cells at d5 after stimulation with an HLA-A2-restricted CMV pp65 peptide (NLVPMVATV)  $\pm$  gMDSC enrichment; intracellular Ki67 staining of CD3<sup>+</sup> T cells stimulated with CEF upon depletion ( $\Delta$  gMDSC) or enrichment of gMDSC (+ gMDSC). Flow cytometric isolation of a pure gMDSC; **f**) gating strategy used on the FACSaria to isolate a 97% pure population of gMDSC (CD33<sup>+</sup>CD11b<sup>high</sup>CD14-CD15<sup>+</sup>) from PBMC. **g**) IFN- $\gamma$  and TNF- $\alpha$  response and CD3-z expression from CD3<sup>+</sup> T cell population following stimulation with plate-bound anti-CD3 with or without readdition of flow cytometric purified gMDSC (effector:target ratio: 1:2).

**SUPPLEMENTARY FIGURE 6**

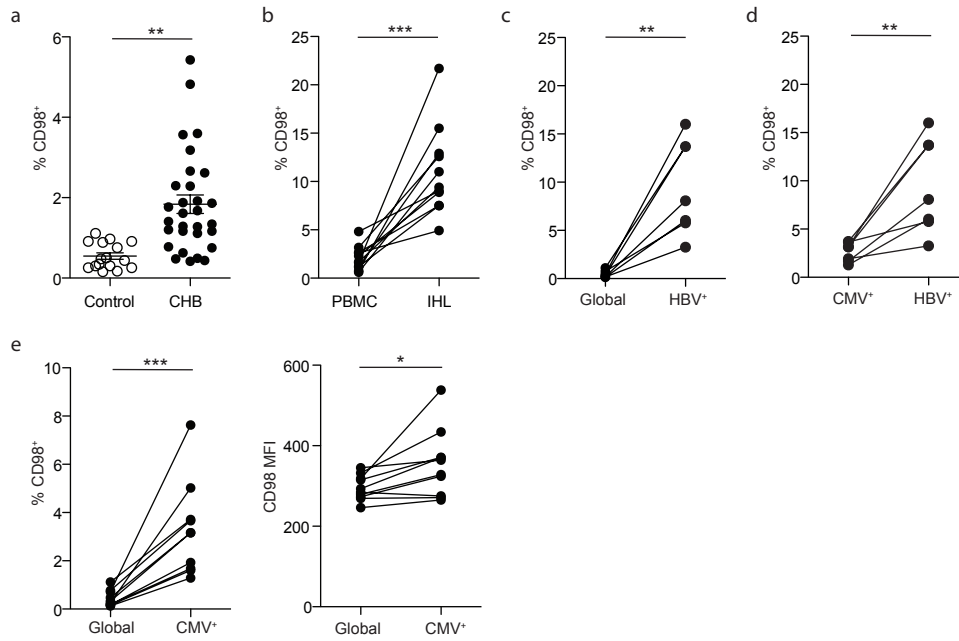

**Supplementary Figure 6: Differential CD98 expression on T cells in CHB**

Cumulative data depicting expression (percentage) of CD98 on CD3<sup>+</sup> T cells from **a**) 16 healthy controls and 30 subjects with CHB; **b**) paired PBMC and IHL samples (n = 11, paired CHB); **c**) paired global and HBV-specific CD8<sup>+</sup> T cells (identified using HLA-A2 restricted dextramers, described in **Online Methods**), **d**) HBV- and CMV-specific CD8<sup>+</sup> T cells (n = 7, CHB) and **e**) global and CMV-specific CD8<sup>+</sup> T cells (n = 10, CHB). Error bars represent the mean  $\pm$  SEM for the cohorts indicated; \* p<0.05; \*\* p<0.01; \*\*\* p<0.001; **a** unpaired *t* test, **b-e** paired *t* test.

Supplementary Table 1: Study participant details

| <b><u>Heparin</u></b>          | <b>Age (years)</b><br>median<br>(range) | <b>Sex (%)</b><br>male :<br>female | <b>ALT IU/L</b><br>median<br>(range) | <b>HBV DNA IU/ml</b><br>median (range)          | <b>HBsAg IU/ml</b><br>median (range)            | <b>HBeAg (%)</b><br>pos : neg |
|--------------------------------|-----------------------------------------|------------------------------------|--------------------------------------|-------------------------------------------------|-------------------------------------------------|-------------------------------|
| CHB<br>(n = 84)                | 39 (17 - 61)                            | 62 : 38                            | 47 (10 - 311)                        | $1.2 \times 10^8$<br>(blq - $1.5 \times 10^9$ ) | $0.9 \times 10^4$<br>( $26 - 1.6 \times 10^6$ ) | 37 : 63                       |
| Healthy<br>control<br>(n = 44) | 35 (24 - 64)                            | 45 : 55                            | n/a                                  | n/a                                             | n/a                                             | n/a                           |

| <b><u>EDTA</u></b>             | <b>Age (years)</b><br>median<br>(range) | <b>Sex (%)</b><br>male :<br>female | <b>ALT IU/L</b><br>median<br>(range) | <b>HBV DNA IU/ml</b><br>median (range)        | <b>HBsAg IU/ml</b><br>median (range) | <b>HBeAg (%)</b><br>pos : neg |
|--------------------------------|-----------------------------------------|------------------------------------|--------------------------------------|-----------------------------------------------|--------------------------------------|-------------------------------|
| CHB<br>(n = 54)                | 38 (19 - 72)                            | 61 : 39                            | 31 (10 - 586)                        | $9.3 \times 10^4$<br>(blq - $7 \times 10^7$ ) | 1805<br>( $42.6 - 8.3 \times 10^4$ ) | 13 : 87                       |
| Healthy<br>control<br>(n = 55) | 31 (21 - 85)                            | 45 : 55                            | n/a                                  | n/a                                           | n/a                                  | n/a                           |

\* CHB = subjects with chronic hepatitis B; ALT = serum alanine transaminase; blq = below the level of quantification; n/a = not applicable

Supplementary Table 2: Full details of all directly-conjugated antibodies

| Marker                         | Clone      | Fluorochrome  | Supplier      | Dilution | Catalogue No.   |
|--------------------------------|------------|---------------|---------------|----------|-----------------|
| CD11b                          | ICRF44     | PECy7         | eBioscience   | 2:100    | 25-0118-42      |
| HLA-DR                         | L243       | eFluor450     | eBioscience   | 3:100    | 9048-9952-025   |
| HLA-DR                         | G46.6      | HorizonV500   | BD Bioscience | 2:100    | 561224          |
| CD33                           | WM53       | AlexaFluor700 | eBioscience   | 3:100    | 56-0338-41      |
| CD16                           | 3G8        | APCCy7        | BD Bioscience | 2:100    | 557758          |
| CD63                           | HSC6       | PE            | BD Bioscience | 2:100    | 561925          |
| CD15                           | HI98       | APC           | BD Bioscience | 7:100    | 551376          |
| CD14                           | M5E2       | HorizonV500   | BD Bioscience | 2:100    | 561391          |
| CD66b                          | G10F5      | PerCPCy5.5    | Biologend     | 2:100    | 305107          |
| CXCR1 (CD181)                  | 8F1/CXCR1  | FITC          | Biologend     | 2:100    | 320605          |
| CCR2 (CD192)                   | K036C2     | PE            | Biologend     | 2:100    | 357205          |
| CXCR3 (CD183)                  | IC6        | PerCPCy5.5    | BD Bioscience | 2:100    | 560832          |
| CXCR4 (CD184)                  | 12G5       | PE            | Biologend     | 2:100    | 306505          |
| CD3 $\epsilon$                 | UCHT1      | PECy7         | eBioscience   | 1:100    | 25-0038-42      |
| CD8                            | OKT8       | AlexaFluor700 | eBioscience   | 1:200    | 56-0086-73      |
| CD4                            | RPA-T4     | APC-eFluor780 | eBioscience   | 1:200    | 47-0049-42      |
| Granzyme B                     | GB11       | FITC          | Biologend     | 1:100    | 515403          |
| CD19                           | HIB19      | HorizonV500   | BD Bioscience | 1:100    | 561125          |
| CD98                           | MEM-108    | FITC          | Biologend     | 2:100    | 315603          |
| CD71                           | CY1G4      | APCCy7        | Biologend     | 2:100    | 334109          |
| Live/dead                      | na         | Blue (UV)     | Invitrogen    | 2:1000   | L-23105         |
| <i>Arginase I</i>              | 6589922    | FITC          | R&D Systems   | 5:100    | IC5868F/IC8026G |
| <i>MPO</i>                     | MPO455-8E6 | PE            | eBioscience   | 1:400    | 12-1299-41      |
| CD3-<br>$\zeta$ □□□□□□□□       | 6B10.2     | PE            | eBioscience   | 1:200    | 12-2479-80      |
| <i>IFN-<math>\gamma</math></i> | B27        | HorizonV450   | BD Bioscience | 2:100    | 560371          |
| <i>Ki67</i>                    | B56        | PE            | BD Bioscience | 5:100    | 556027          |
| <i>TNF-<math>\alpha</math></i> | 6401.111   | APC           | Biologend     | 1:200    | 502912          |

\* Antibodies used for intracellular staining are in *italics*
